# Supplementary material for: Overcoming the nutritional immunity by engineering iron-scavenging bacteria for cancer therapy
Source: eLife. 2024 May 15;12:RP90798. doi: 10.7554/eLife.90798 (PMC11095936; doi:10.7554/eLife.90798)
Supplement: Source data 1. [file elife-90798-data1.xlsx]

## Sheet: Fig 1a
Tumor	LB
P0ADQ2	P0AEP1
P0AED7	P0ADQ2
P02931	P0AG99
P0CE48;P0CE47	P0A809
P0A9B2	P37652
P0A6Y8	P16676
P0A6P9	P32674
P0A7K2	P0A6X1
P77444	P77754
P0A9Q7	P37313
P0A910	P18133
P0A825	P30744
P0A799	P0A9W6
P0ACF0	P0AED7
P62707	P42216
P0ABU5	P0C0L7
P0AE08	P0AAD6
P15288	P02931
P0ABB0	P76055
P0AB71	P0ACE3
P0A7V3	P0AFP4
P05825	P0A8Y1
P0A6F5	P64599
P15639	A0A385XJ53;P0CF13;P0CF12;P0CF11;P0CF07;P0CF10;P0CF09;P0CF08
P0A6F9	P0CE48;P0CE47
P0C8J8	P33014
P0A7L0	P42626
P25665	P0A9B2
P76116	P0A6J1
P00490	P64636
P0A917	P08245
P0AG67	P0AC30
P09373	P00903
P0A7G6	P0ABG4
P0ACF8	P0A9K1
P0AG48	P39371
P0AFG8	P76035
P0ABJ9	P64499
P60723	P24586
P0A7W1	P77541
P0A7R1	P16701
P0A6M8	P0ABG7
P0A7J3	P31545
P0A9X4	P0AFR2
P69783	P39407
P0A7R5	P68567
P0A7S9	P0A8D3
P0ABB4	P76046
P0A7K6	P0A9F9
P0A7V8	P0A8V0
P62399	P0A8P6
P60438	P0A7H0
P0A9K9	P0ABX5
P06959	P76340
P0A7J7	P0A8S5
P0A7Z4	P75830
P60624	P0A6D7
P08839	P10442
P02413	P37760
P0A6P1	P0A6C1
P0AA25	P0AG71
P0AGD3	P75936
P0AG55	P26365
P0A7T7	P33231
P0A7M6	P0ADV9
P00864	P0ABW9
P02359	P76185
P11454;Q8XBV9	P29744
P0ADI4	P68183
P0A7X3	P0AGL5
P0AG30	P46889
P0AA10	P23325
P0A9Y6	P36548
P0A6S7	P0A6S3
P0A9C5	P0AFF0
P0A7V0	P04994
P0A9P0	P0A962
P0ADY3	P0A8P8
P0A7A9	P0AA47
P0AA04	P77285
P0ABT2	P30844
P03018	P60472
P52643	P0AFI5
P0A858	P0C0T5
P02943	P0ADC3
P0AG63	P0AB12
P0A7T3	P37590
P0ADY7	P05041
P00961	P09029
P0AG44	P75821
P0ABH7	P33940
P0ACF4	P06993
P0A817	P78061
P0A850	P0A8Q6
P69805	P0A9T6
P60422	P0C960
P0A6F3	P75938
P12758	P36930
P61175	P28306
P0A6A8	P75933
P28635	P0AA95
P68919	P0A6Y8
P22523	P41036
P0A7R9	P31473
P0A6A3	P37024
P08200	P0ABX2
P0AEU7	P37351
P17315	P0AEM4
P0A8M6	P75942
P0A9S3	P0AD42
P0A7U3	P77611
P0AE18	P0A6P9
P0A9T0	P0A7K2
P05793	P20605
P0A7L3	Q46861
P64624	P77444
P37902	P76402
P69797	P39280
P0A7W7	P77214
P0A7D7	P0AG76
P0A8T7	P0ACH5
P0A853	P24188
P0A905	P64614
P23869	P0AAU7
P00509	P0A8S9
P39300	P0ACP5
P0A9C0	P10384
P69441	P0ACL7
P21599	P0A752
P39452	P37194
P07862	P04982
P37095	P39451
P61889	P77544
P15770	P0AFW2
P02358	P24242
P67910	P0DMC5
P0A6X7	P0AER5
P0A7D4	P0ACY9
P0A9D8	P77243
P33232	P24192
P0AEZ1	P0A9Q7
P0AB80	P0AB14
P22106	P76213
P33920	P0A9J4
P27294	P42632
P0ABP8	P16681
P0A7U7	P15038
P69776	P27300
P0A6T1	P0A6M2
P0ADZ4	P0AB65
P0AG90	P0AE37
P0A9M8	P23842
P00963	P77717
P0AC33	P06610
P0A7M9	P06136
P31979	P33916
P0A8R0	P0AG80
P06971	P75874
P0ACA3	P05706
Q46814	P46130
P0AAI5	P0AGM5
P0ADE8	P31133
P27302	P0A910
P0A862	P29131
P0AEK4	P65292
P00957	P76445
P13009	P0ABJ1
P0ABA0	P33362
P33650	P76216
P0AG51	P0A9N8
P0A6X3	P0AC96
P0AD49	P0ACC1
P0AEX9	P31825
P0A7N9	P0A6T9
P0A8V2	P0AE58
P02930	P37005
P22259	P64606
P61949	P21151
P0A870	P25740
P0A8W8	P0C037
P0AG59	P0A825
P76461	P0A937
P0ACJ8	P0A799
P0A8N3	P0A9F6
P77499	P76128
P00968	P77239
P0ABK2	P38054
P0A6Z3	P12994
P0AD61	P0ACF0
P0A6T5	P13482
P76002	P0A746
P45578	P62707
P05055	P0AFJ1
P77690	P0ABU5
P07623	P77522
P0A6Y1	P04846
P0A7M2	P46852
P0A9A6	P0AAF6
P13039	P0AE08
P60390	P0A832
P0A8M0	P15288
P15047	P25738
P05459	P0AEH1
P69801	P31808
P33195	P08202
P0A707	P0A6A6
P0ABA4	P76215
P0A717	P77712
P68679	P0A8C4
P0A998	P45395
P00393	P42599
P0ADZ0	P0AGG4
P0ADW3	P67095
P0ABA6	Q46808
P0AGE0	P22186
P68767	P0AFX4
P0A6F1	P29013
P76373	P0ABB0
P24232	P0AEQ6
P0A6K6	P32157
P18843	P0AB71
P0A796	P0A7V3
P0A7E5	P65367
B1J0Z5;B1LHT5;B7L3Z1;B7NK86;B1XDY2;B7N8H0;C4ZT96;P04335;Q1RFT1;B7UJC7;B7MC89;B7M268;B5Z1I3;Q8X7N7;A1A7V0;A7ZWK2;B6I019;B7MQ75;Q0TL77;Q8FKM5;A7ZHZ8;B7LNG1	P05825
P0A6N4	P0AAQ2
P0ABU2	P0A6F5
P16659	P15639
P0A6E4	P0ADC1
P23721	P25534
P0A6N8	P31806
P0AES4	P0A8Y3
P0AG86	P60720
P0AGE9	P0AD05
P07913	P0A6F9
P0A6G7	P14081
P0A8E7	P0A8A8
P0AFG6	P0A6I6
P0AED0	P0A830
P0A8X2	P0A8H6
P0ADE6	P0A6I0
P0AC38	P0AB10
P04079	P06961
P02924	P45464
P63284	P03817
P00350	P77213
P00962	P0ADN6
P08178	P77529
P27248	P61316
P0AB77	P36659
P10408	P0C8J8
P17117	P10908
P0A836	Q46948
P0A953	P62615
P0ADG4	P0A6V1
P23893	P75797
P37188	P06846
P10378	P61320
P62768	P51981
P0ACX3	P0A7L0
P0ADG7	P37686
P04693	Q47679
P37128	P42269
P0AFG0	P0A8D0
P0ABK5	P37649
P0A8G3	P0AC92
P07813	P68191
P15640	P25665
P0A9Q9	P39286
P21893	P52096
P0A955	P76116
P0AB24	P00490
P33221	P0ABI4
P0A840	P64483
P07395	P0A6L9
P37146	P0A917
P39177	P25539
P0C0V0	P0AG67
P0A7N4	P0A873
P17169	P0A9I3
P0AC69	P76243
P69506	P24255
P21513	P30845
P0AE06	P0AB26
P0AAI3	P66948
P0A6E6	P06988
P0A9W3	P0AF48
P11447	P0AAG0
P0DTT0	P0AA43
P0A715	P31433
P37648	P30126
P37349	P0AB28
P0AFM6	P0ACN4
P0AGL2	P37615
P0ADU2	P0ABS5
P0AEQ3	P0AFH2
P0A8L1	P09373
P0ACJ0	P77570
P15254	P0ACV4
P0A6L0	P0AEW4
P0A6C8	P30011
P0A9A9	P37182
P0A8S1	Q47710
P0AC53	P76506
P00956	P0A7G6
P0A7P5	P16528
P0AB91	P75777
P0A6L2	P37647
P39831	P27247
P07118	P60340
P0ABD8	P0AAP3
P31663	P0AEI6
P0A786	P0ADK8
P0AC86	P0ACF8
P0AEZ3	P0A9R4
P0A9W9	P0A6M4
P61714	Q59385
P39172	P0AG48
P0CB39	P0A6D0
P00954	P17445
P0ABU9	P0AFG8
P63224	P08373
P0A6Q6	P15723
P0AC55	P76149
P27298	P0AC16
P77398	P0AG00
P0AG20	P29680
P0A7S3	P22524
P0ADN2	P32144
P0A927	P32099
P0A9Q1	P0A8A2
P0A8M3	P0A8T1
P24182	P0AEG6
P0ABD3	P27305
P69831	P69228
P22188	P0AE34
P0A912	P0CG19
P0AF93	P0A9K7
P04805	P77781
P0A940	P37759
P45565	P76440
P05791	P0A6H8
P60906	P26602
P11446	P0ABN1
P76027	P62517
P76458	P0A7C6
P0AAT6	P0A8A4
P0AES6	P0ADS9
P17846	P0ABJ9
P0A6L4	P54901
P0A9P9	P76561
P69828	P39285
P0A8F0	P60723
P04825	P0ADC6
P45523	P22634
P0C018	P0A951
P0ADU5	P0ACV0
P0A9G6	P41052
P0A8Y8	P69795
P0A9H7	P0A6E1
P0A6H5	P35272
P07650	P0A7W1
P0AFF6	P25397
P45577	P0A7R1
P0AFP6	P32695
P06715	P76290
P30177	P24554
P07001	P76418
P0AB89	P0AB18
P0ADZ7	P76272
P19926	P67080
P64581	P76503
P0A6B7	P0A6M8
P0ABD5	P09126
P0ABH9	P66817
P0A6R0	P07109
P0A8P3	P0A968
P16869	P23894
P0A6C5	P0A7J3
P64596	P23862
P0A705	P0AB03
P0AC62	P0A948
P0A805	P0AGL7
P0A879	P23003
P52076	P60955
P0AG18	P76541
P0A749	P03023
P77739	P0A8U0
P02916	P59588;P07000
P0ADA5	Q93K97
P09551	P0A9X4
P33643	P0AGD1
P0A7X6	P67826
P0AE52	P69783
P15042	P25746
P21170	P27828
P0C0L2	P23367
P0A6H1	P75809
P0ABU7	P0A6A0
P0AFX0	P07649
P38489	P0A7R5
P28903	P25536
P23847	P0A7S9
P68187	P0A935
P76372	P0ABB4
P0AG27	P0AGB6
P69222	P0A8W5
P0A9S5	P08179
P0A794	P0A8E5
P00550	P76256
P0ACB2	P37671
P0AAI9	P0A7K6
P0AAT9	P76108
P00561	P76115
P0A7F3	P31680
P36683	P00547
P37177	P64588
P75791	Q2MB16
Q46856	P52119
P18335	P0AC44
P0A7L8	P67660
P0C0R7	P65556
Q46845	P22525
P08244	P0A8J2
P0A800	P75931
P69786	P52007
P13035	P64476
P0AA16	P76491
P33363	P16703
P0AGJ9	P15067
P0AFY8	P31475
P37690	P77569
P21889	P0AEY3
P0ACG1	P25888
P00909	P31460
P09394	P75952
P0A8W0	P0AAZ4
P39396	P0A6K1
P76658	P04995
P0A7E9	P19934
P0AEU0	P0AD27
P0A6P5	P19624
P0A9M2	P0AFJ7
P37689	P0A8I8
P69811	P52094
P39173	P69931
P77774	P76403
P0A903	P0ADI9
P69913	P0ACV6
P13029	P0A738
P0A9M5	P28905
P00579	P0AE30
P0A6U3	Q46893
P0A6V8	P37025
P0AF50	P50456
P25894	P76052
P0ABC3	P75796
P69411	P76170
P00448	P46474
P13445	P0AEE3
P0A8I3	P0A6I3
P35340	P0A7V8
P0AEK2	P46118
P00452	P0ABV6
P0AC47	P0AFW0
P0ADP9	P0ACM2
P0A7B8	P27830
P0AE88	P0A8N7
P0AEN8	P77202
P31057	P0AEW6
P0A8N5	P30749
P00960	P0ACS5
P0A8N0	P63386
P36879	P03024
P10121	P62399
P39325	P26647
P0A8J8	P0C0K3
P36938	P77171
P0ABC7	P31467
P0AC41	P23331
P0A908	P0AB58
P0AFG3	P60293
P77757	P39265
P0ABS1	P36655
P0A9Q5	P05852
P0AFA7	P32173
P0AC19	P0AEC5
P0A8F4	P27303
P0ACA7	P76502
P0AAB8	P32664
P0AB67	P24230
P0ADY1	P24202
P0A9D2	P62586;P42501
P30843	P37617
P31120	P39309
P07003	P06282
P0A7B5	P56258
P37666	P60438
P33602	P09549
P09372	P0A8U2
P0A877	Q47622
P0AFC7	P30014
P0A6D3	P0AGJ2
P04425	P0A8Z0
P0A9K3	P31550
P30750	P39161
P15034	P0AAT4
P0A7Z0	P15028
P0A9P4	P43533
P00562	P0ACI6
P0AFU8	P0ACZ8
P25553	P07648
Q46851	P0ACS7
P07012	P0ABB8
P20966	P0ADT2
Q46769	P0A8B2
P0AEP3	P0AG03
P0AC59	P0CK95
P0A9U3	P69423
P0AG07	P25889
P00959	P13036
P27434	P63883
P68066	P00888
P25714	P0A7F9
P33599	P0A7Y4
P64604	Q46802
P63020	P21338
P22255	P23930
A7ZZ66;B1IUF7;B7MTN8;P0A8E3;P0A8E2;P0A8E1;C4ZS48;B7UPC4;B7NKH1;B7NAY6;B7MJ95;Q0TIW6;B7LX42;B7LG41;B6I9I6;B5YVX7;B1XA18;B1LI36;A7ZKL2;B7LSP9	P0AGJ7
P23865	P17109
P0A780	P37908
P0ADS6	P52644
P0A729	P05523
P08660	P69853
P0AE82	P37631
P0A812	P0A972
P0A8Y5	P0ABY4
P0A763	P00936
P60651	P06616
P07014	P0A9K9
P75823	P76104
P09053	P76291
P0C0S1	P14294
P06987	P00861
P0AB55	P0AAH4
P06720	P0A944
P30958	P36928
P28304	P75822
P0AC51	P14176
P23843	P69741
P0AEN1	P46888
Q46829	P75746
P21499	P33235
P08622	P0ABJ3
P37665	P06959
P76576	P0A7J7
P09546	P0A7Z4
P0AEJ2	P60624
P23908	P08839
P31224	P02413
P16384	P0A6P1
P60757	P0AA25
P0AEB2	P0AGD3
P77718	P0AG55
P24171	P0A7T7
P0A9P6	P0A7M6
P23305	P00864
P0AFK9	P02359
P09323	P0ADI4
P0A6W5	P0A7X3
P0AEE1	P0AG30
P0A8G6	P0AA10
P0ACW6	P0A9Y6
P0ACB7	P0A6S7
P61517	P0A9C5
P37051	P0A7V0
P0AB98	P0A9P0
P16456	P0ADY3
P0A6K3	P0A7A9
P23917	P0AA04
P43329	P0ABT2
P0A884	P03018
P0ACY1	P52643
P0A8C1	P0A858
P0AC81	P02943
P0AEB7	P0AG63
P23538	P0A7T3
P0AF20	P0ADY7
P08390	P00961
P0AAB6	P0AG44
P0AF70	P0ABH7
P76459	P0ACF4
P39199	P0A817
P0A9T4	P0A850
P42593	P69805
P0AC02	P33012
P09831	P60422
P60785	P0A6F3
P08312	P12758
P0AGJ5	P61175
P0AAA1	P0A6A8
P0AAC0	P28635
P39353	P68919
P46853	P22523
P0AER8	P0A7R9
P43671	P0A6A3
P75728	P08200
P43672	P0AEU7
P28861	P0A8M6
P0AG16	P0A9S3
P76187	P0A7U3
P77581	P0AE18
P0A790	P0A9T0
P0ACU7	P05793
P37903	P0A7L3
P0ADS2	P64624
P0A722	P37902
P0AET8	P69797
P64451	P0A7W7
P0A8B5	P0A7D7
P0A855	P0A8T7
P25519	P0A853
P06999	P0A905
P0A9L3	P23869
P0ACE7	P00509
P09424	P39300
P45465	P0A9C0
P0A7A7	P69441
P14175	P21599
P27249	P07862
P0A9V1	P37095
P0ACC7	P61889
P23839	P15770
P0A9R7	P02358
P06710	P67910
P21507	P0A6X7
P67087	P0A7D4
P75913	P0A9D8
P07821	P33232
P0ABU0	P0AEZ1
P69924	P0AB80
P0A8F8	P22106
P12281	P33920
P0AAR3	P27294
P0ACC3	P0ABP8
P0C054	P0A7U7
P0A7F6	P69776
P76034	P0A6T1
P0AF03	P0ADZ4
P0A744	P0AG90
P60664	P0A9M8
P60560	P00963
P0AEH5	P0AC33
P09832	P0A7M9
P76015	P31979
P0ACR9	P0A8R0
P0A9Z1	P06971
P21165	P0ACA3
P33136	P0AAI5
P15977	P33219
P38038	P0ADE8
P0AES0	P27302
P0A759	P0A862
P39160	P0AEK4
P11875	P00957
P0AEC3	P13009
P51024	P0ABA0
P0A9J8	P0AFC3
P75914	P33650
P0AF12	P0AG51
P0AEG4	P0A6X3
P0A6J8	P0AD49
P0AA91	P0AEX9
P0AGA2	P68699
P00934	P0A7N9
P75915	P0A8V2
P45799	P02930
P00904	P22259
P0AGD7	P61949
P69503	P0A870
P00370	P0A8W8
P03841	P0AG59
P00887	P0ACJ8
P0A867	P0A8N3
P23909	P77499
P30860	P00968
P39406	P0ABK2
P0AFK0	P0A6Z3
P0ADR8	P0AD61
P08506	P0A6T5
P00946	P76002
P07004	P45578
P0A901	P05055
P0A6Y5	P77690
P26646	P07623
P45568	P0A6Y1
P0A7G2	P0A7M2
P77775	P0A9A6
P31142	P60390
P07639	P0A8M0
P0ACL2	P05459
P63177	P69801
P31554	P33195
P75818	P0A707
P0AFD4	P0ABA4
P62617	P0A717
P0ADV5	P68679
P46859	P0A998
P0ACI0	P00393
P0A6W9	P0ADZ0
P0AF28	P0ADW3
P33355	P0ABA6
P24215	P0AGE0
P0AF24	P68767
P04036	P0A6F1
P12008	P76373
P0A7I7	P24232
P0A7B1	P0A6K6
P29217	P18843
P0A9N4	P0A796
P0ADI7	P0A7E5
P0A725	B1J0Z5;B1LHT5;B7L3Z1;B7NK86;B1XDY2;B7N8H0;C4ZT96;P04335;Q1RFT1;B7UJC7;B7MC89;B7M268;B5Z1I3;Q8X7N7;A1A7V0;A7ZWK2;B6I019;B7MQ75;Q0TL77;Q8FKM5;A7ZHZ8;B7LNG1
P62620	P0A6N4
P76268	P0ABU2
P0AAH0	P16659
P63417	P0A6E4
P30859	P23721
P09127	P0A6N8
P0AFD6	P0AES4
P0A731	P0AG86
Q46868	P0AGE9
P11290	P07913
P0A7I4	P0A6G7
P0AEM0	P0A8E7
P60716	P0AFG6
P0ABF6	P0AED0
P28248	P0A8X2
P0AFD1	P0ADE6
P28249	P0AC38
P25522	P04079
P02925	P02924
P0AD12	P63284
P03004	P00350
P0AEW9	P00962
P0C8J6	P08178
P0A9L5	P27248
P05042	P0AB77
P00803	P10408
P11880	P17117
P76270	P0A836
P0A894	P0A953
P07604	P0ADG4
P77395	P23893
P06986	P37188
P28904	P10378
P0A887	P62768
P0AGK4	P0ACX3
P77173	P0ADG7
P0ACP7	P04693
P0AFU4	P37128
P0A7J0	P0AFG0
P10371	P0ABK5
P06149	P0A8G3
P75957	P07813
P0AFM2	P15640
P0A9H1	P0A9Q9
P41407	P21893
P09030	P0A7A5
P06983	P0A955
P0AF18	P0AB24
Q2M7R5	P33221
P76472	P0A840
P0ACQ4	P07395
P0AB52	P39177
P0AEZ9	P0C0V0
P0ADK0	P0A7N4
P77434	P17169
P0A8I5	P0AC69
P0AGB0	P21513
P0AEX5	P36767
P29012	P0AE06
P25718	P37645
P37773	P0AAI3
P55253;P37744	P0A6E6
P0A8K1	P0A9W3
P0AGK8	P11447
P0ABZ6	P0DTT0
P04391;P06960	P0A715
P0AE48	P37648
P0A9L8	P37349
P21888	P0AFM6
P04968	P0AGL2
P0AC13	P0ADU2
P76113	P0AEQ3
P30863	P0A8L1
P0ABH0	P0ACJ0
P08395	P15254
P29745	P0A6L0
Q46920	P0A6C8
P39099	P0A9A9
P23836	P0A8S1
P0AAG8	P0AC53
P0A988	P00956
Q8X8L4;P56262	P0A7P5
P68206	P0AB91
P00895	P0A6L2
P0A6P7	P39831
P29018	P07118
P22333	P0ABD8
P00935	P31663
P0A8X0	P0A786
P0A9F3	P0AC86
P21367	P0AEZ3
P0A7E3	P0A9W9
P0DP90;P0DP89	P61714
P0A784	P39172
P0ABN5	P0CB39
P0AFQ7	P00954
P30850	P0ABU9
P67603	P63224
P00582	P0A6Q6
P45955	P27298
P0ADQ7	P77398
P27833	P0AG20
P0ACP1	P0A7S3
P0A6Q3	P0ADN2
P24203	P0A927
P23830	P0A9Q1
P21645	P0A8M3
P0A9D4	P24182
P05020	P0ABD3
P0AE91	P69831
P0AGG8	P22188
P0ACE0	P0A912
P06721	P0AF93
P17993	P04805
P0AE78	P0A940
P0A8W2	P45565
P76558	P05791
P39342	P60906
P0AFL3	P11446
P77808	P76027
P76217	P0AAT6
P13024	P0AES6
P30178	P17846
P06968	P0A6L4
P27278	P0A9P9
P36680	P69828
P0A6U8	P0A8F0
P24178	P04825
P69829	P45523
P16926	P21865
Q03961;P42213	P0C018
P0ADA3	P0ADU5
P04951	P0A9G6
P0A8A0	P0A9H7
P55293	P0A6H5
P0AE12	P07650
P23882	P0AFF6
P0A8U6	P45577
P64574	P0AFP6
P0AFL6	P06715
P77376	P30177
P15043	P07001
P52108	P0AB89
P0ADX1	P0ADZ7
P17952	P19926
P27836	P64581
P0AEY5	P0A6B7
P36672	P0A9C9
P13033	P0ABD5
P0AE01	P0ABH9
P75691	P0A6R0
P0AFX9	P0A8P3
P77348	P0A6C5
P45748	P17854
P76473	P64596
P77625	P0A705
P0A6W3	P76145
P0A734	P0AC62
P0A6R3	P0A805
P0ABI8	P0A879
P0A761	P0AG18
P0AEL6	P0A749
P25437	P77739
P08956	P02916
P0AF98	P0ADA5
P30871	P09551
P05804	P33643
P60546	P0A7X6
P0A9J0	P0AE52
P0A993	P15042
P17115	P21170
P0ACD4	P76621
P75849	P0C0L2
P75949	P0A6H1
P0ADT8	P0ABU7
P77756	P0AFX0
P0ADF6	P38489
P25745	P28903
P07024	P23847
P75838	P68187
P0AC84	P76372
P0AFW4	P0AG27
P77258	P69222
P63389	P0A9S5
P0AFR4	P0A794
P0A9X9	P00550
P10441	P0ACB2
P69425	P0AAI9
P75736	P0AAT9
P39835	P00561
P08192	P0A7F3
P64429	P36683
P31802	P37177
P0AFT5	P75791
P11557	Q46856
P0AF90	P18335
P08194	P0A7L8
P76537	P0C0R7
P0AD57	Q46845
P30864	P08244
P63228	P0A800
P25526	P69786
P62623	P13035
P76422	P0AA16
P08331	P33363
P76585	P0AGJ9
P69922	P0AFY8
P36979	P37690
P0ABF1	P21889
P10100	P0ACG1
P0AEA8	P00909
P0AG14	P09394
P17443	P0A8W0
P0AFZ3	P39396
P76341	P76658
P0AE14	P0A7E9
P22256	P0AEU0
P76004	P0A6P5
P0A698	P0A9M2
P02919	P37689
P75863	P69811
P0AGE6	P39173
P32669	P77774
P27550	P0A903
P52061	P69913
P09158	P13029
P00363	P0A9M5
P25524	P00579
P77247	P0A6U3
P76014	P0A6V8
P76536	P0AF50
P0ADX7	P25894
P0AGG0	P0ABC3
P14900	P69411
P40191	P00448
P0A6B4	P13445
P67244	P0A8I3
P0AFS3	P35340
P38521	P0AEK2
P46837	P00452
P02918	P0AC47
P23827	P0ADP9
P36929	P39321
P69451	P0A7B8
P18196	P0AE88
P0A6S0	P0AEN8
P0AAC8	P0AFW8
P33570	P31057
P15877	P0A8N5
P32680	P23200
P77735	P00960
Q47147	P0A8N0
P10443	P36879
P0AG93	P10121
P0A6U5	P39325
P10346	P0A8J8
P64612	P36938
P75792	P0ABC7
P25535	P0AC41
P30870	P0A908
P37440	P0AFG3
P0ABE7	P77757
P05458	P0ABS1
P0A9H5	P0A9Q5
Q46857	P37613
P0ADP0	P0AFA7
P12295	P0AC19
P0AFF2	P0A8F4
P0AFZ1	P0ACA7
P0AAX8	P0AAB8
P0AFB8	P0AB67
P40874	P0ADY1
P60240	P0A9D2
P28629	P30843
P0AE45	P31120
P24251	P0AB61
P27848	P07003
P76008	P0A7B5
P32131	P37666
P69874	P33602
P0A8J4	P09372
P61887	P0A877
P52647	P23857
P33018;B1X7P2;B1IYB5;A8A215;Q8X635;Q8FFU3;Q0TFT6;A7ZNX7;Q1R9R8;A1AD14;B1LKQ1	P0AFC7
P27829	P0A6D3
P31455	P21515
P77804	P04425
P60595	P0A9K3
P0ADV7	P30750
P21177	P15034
P32176	P0A7Z0
P75745	P0A9P4
P0A6J5	P00562
P25552	P0AFU8
P0ABQ4	P25553
P77488	Q46851
P0ACB0	P07012
P0A7C2	P20966
P0A847	Q46769
P32662	P0AEP3
P0AEI4	P0AC59
P0AGF2	P0A9U3
P21169	P0AG07
P0ABE2	P00959
P0AGG2	P27434
P0A8V6	P68066
P0A7Y0	P31678
P25516	P07762
P45766	P25714
P06612	P33599
P37692	P64604
Q47146	P63020
Q57261	P22255
P0AGI8	P37637
P0ACL0	A7ZZ66;B1IUF7;B7MTN8;P0A8E3;P0A8E2;P0A8E1;C4ZS48;B7UPC4;B7NKH1;B7NAY6;B7MJ95;Q0TIW6;B7LX42;B7LG41;B6I9I6;B5YVX7;B1XA18;B1LI36;A7ZKL2;B7LSP9
P0A7D1	P23865
P0ABQ0	P0A780
Q46925	P39187
P0ADT5	P0ADS6
P77475	P0A729
P0A6Z1	P08660
P77150	P0AEL3
P33218	P0AE82
P39310	P0A812
P0AFI7	P0A8Y5
P0ACL9	P0A763
P16095	P60651
P22564	P42620
P0AG40	P07014
P37661	P75823
P75867	P09053
P76535	P0C0S1
P77536	P06987
P39830	P0AB55
P77737	P06720
P0A9H3	P30958
P0AEI1	P28304
P0A7Y8	P0AC51
P27838	P23843
P26616	P0AEN1
P39384	Q46829
P64556;P64555;P64554	P21499
A8A5M0;B1IP53;B6I2X6;B7L4T9;B7M1W8;A7ZSU1;P13001;C4ZUR7;B1X758;B7UKB7;B7NE17;B1LHL2;Q8X716;B7LSB5;Q8FCT4;Q1R5M2;B7NMH7;B7MDN8;B5YTW3;A1AGT6;Q0TC55	P08622
P0AAE0	P37665
P0ACB4	P76576
P37330	P09546
P45425	P23908
P75864	P31224
P0C093	P16384
P60752	P60757
P37765	P0AEB2
P31677	P77718
P20083	P24171
P0AAB4	P0A9P6
P0ABQ2	P23305
P0A7A2	P0AFK9
P77318	P09323
P0AEF0	P0A6W5
P75694	P0AEE1
P07023	P0A8G6
P33030	P0ACW6
P0A823	P0ACB7
P37685	P61517
P41409	P37051
P77399	P0AB98
P06992	P16456
P39346	P0A6K3
P0AA39	P23917
P0AEK0	P43329
P76177	P0A884
P77252	P0ACY1
P0ACR4	P0A8C1
P0A996	P0AC81
P38506	P0AEB7
P21179	Q46939
P0A742	P23538
P00926	P0AF20
P0AG82	P08390
P76346	P0AAB6
P77357	P0AF70
P05707	P33358
P27306	P39199
P0AF08	P0A9T4
P64602	P42593
P24228	P0AC02
P0A7E1	P09831
P37634	P60785
P76594	P08312
P08957	P0AGJ5
P0AG84	P0AAA1
P21517	P0AAC0
P77748	P39353
P39401	P46853
P21345	P65807
P0AFI2	P0AAJ8
P77674	P0AER8
P75937	P43671
P32684	P75728
P07117	P28631
P0A959	P43672
P08142	P28861
P65870	P77330
P08997	P23883
P23845	P0AG16
P16700	P76187
P40120	P77581
P31660	P0A790
	P0ACU7
	P37903
	P0ADS2
	P0A722
	P0AET8
	P64451
	P0A8B5
	P0A855
	P25519
	P06999
	P0A9L3
	P0ACE7
	P09424
	P0A7A7
	P14175
	P27249
	P0A9V1
	P0ACC7
	P0A915
	P23839
	P0A9R7
	P06710
	P21507
	P67087
	P75913
	P0ABU0
	P69924
	P0A8F8
	P12281
	P0AAR3
	P0ACC3
	P0C054
	P0A7F6
	P76034
	P0AF03
	P0A744
	P60664
	P60560
	P0AEH5
	P69054
	P09832
	P76015
	P0ACR9
	P0A9Z1
	P21165
	P0A9V5
	P33136
	P15977
	P38038
	P0AES0
	P0A759
	P39160
	P11875
	P0AFE8
	P0AEC3
	P51024
	P0A9J8
	P75914
	P0ADB1
	P0AF12
	P0AEG4
	P23871
	P0AB38
	P0A6J8
	P0AA91
	P0AGA2
	P00934
	P75915
	P45799
	P37338
	P0AGD7
	P69503
	P00370
	P03841
	P00887
	P0A867
	P23909
	P30860
	P39406
	P0AFK0
	P0ADR8
	P08506
	P00946
	P07004
	P0A901
	P0A6Y5
	P26646
	P45568
	P0A7G2
	P77775
	P64585
	P31142
	P07639
	P0ACL2
	P63177
	P31554
	P75818
	P0AFD4
	P24186
	P62617
	P0ADV5
	P46859
	P0ACI0
	P0A6W9
	P0AF28
	P33355
	P24215
	P0AF24
	P04036
	P12008
	P0AAZ7
	P0A7I7
	P0A7B1
	P29217
	P0A9N4
	P0ADI7
	P0A725
	P62620
	P76268
	P0AAH0
	P63417
	P30859
	P09127
	P0AFD6
	P0A731
	P77526
	Q46868
	P11290
	P0A7I4
	P0AEM0
	P60716
	P0ABF6
	P28248
	P0AGC3
	P0AFD1
	P28249
	P25522
	P02925
	P0AD12
	P03004
	P0AEW9
	P0C8J6
	P0A9L5
	P05042
	P00803
	P11880
	P76270
	P0A894
	P07604
	P77395
	P06986
	P45424
	P28904
	P0AER0
	P0A887
	P0AGK4
	P0AF67
	P0AFX7
	P0ABZ4
	P0AC75
	P77173
	P0ACP7
	P0AFU4
	P0A7J0
	P10371
	P06149
	P75957
	P0AFM2
	P0A9H1
	P41407
	P09030
	P06983
	P0AF18
	Q2M7R5
	P76472
	P0ACQ4
	P0AB52
	P0AEZ9
	P0ADK0
	P77434
	P0A8I5
	P0AGB0
	P0AEX5
	P29012
	P25718
	P37773
	P55253;P37744
	P0A8K1
	P0AGK8
	P0ABZ6
	P0AAS7
	P04391;P06960
	P64564
	P0AE48
	P0A9L8
	P21888
	P04968
	P0AC13
	P76113
	P10907
	P30863
	P0ABH0
	P08395
	P29745
	Q46920
	P39099
	P23836
	P0AAG8
	P0A988
	Q8X8L4;P56262
	P68206
	P0A6P7
	P29018
	P22333
	P00935
	P0A8X0
	P0AE39
	P0A9F3
	P21367
	P0A7E3
	P0DP90;P0DP89
	P0A784
	P0ABN5
	P0AFQ7
	P30850
	P67603
	P00582
	P45955
	P0ADQ7
	P27833
	P0ACP1
	P0A6Q3
	P46144
	P24203
	P23830
	P05194
	P21645
	P0A9D4
	P05020
	P0AE91
	P0AGG8
	P0ACE0
	P06721
	P64506
	P17993
	P0AE78
	P0A8W2
	P76558
	P37387
	P0A720
	P62672
	P39342
	P0AFL3
	P77808
	P76217
	P13024
	P30178
	P0A8D6
	P06968
	P23522
	P27278
	P36680
	P0A6U8
	P24178
	P69829
	P16926
	Q03961;P42213
	P0ADA3
	P04951
	P0A8A0
	P55293
	P0AE12
	P33607
	P23882
	P0A8U6
	P13458
	P64574
	P0AFL6
	P77376
	P15043
	P52108
	P0ADX1
	P17952
	P78055
	P27836
	P0AEY5
	P36672
	P06989
	P13033
	P0A881
	P0AE01
	P75691
	P0AFX9
	P77348
	P45748
	P0ACK5
	P76473
	P77625
	P0A6W3
	P0A734
	P0A6R3
	P0ABI8
	P0A761
	P0AEL6
	P25437
	P08956
	P0A7I0
	P0AF98
	P30871
	P05804
	P60546
	P0A9J0
	P0A993
	P17115
	P0ACD4
	P27431
	P75849
	P75949
	P23070
	P0ADT8
	P77756
	P0ADF6
	P0A8R9
	P25745
	P07024
	P0AD24
	P75838
	P0AC84
	P0AFW4
	P26648
	P77258
	P23886
	P21156
	P63389
	P0AFR4
	P0A9X9
	P10441
	P69425
	P75736
	P39367
	P39835
	P08192
	P64423
	P64429
	P31802
	P0AFT5
	P11557
	P0AF90
	P08194
	P0A900;P0A8Z9;P0A8Z8;P0A8Z7
	P76537
	P0AD57
	P30864
	P76539
	P63228
	P25526
	P36771
	P62623
	P0A991
	P76422
	P0ACU5
	P08331
	P76585
	P69922
	P36979
	P0ABF1
	P10100
	P0AEA8
	P0AG14
	P17443
	P0AFZ3
	P55734
	P0AE14
	P0A8I1
	P22256
	P76004
	P0A698
	P02919
	P0ADA1
	P75863
	P0AGE6
	P32669
	P27550
	P52061
	P09158
	P00363
	P0A9B6
	P0AF63
	P25524
	P77247
	P39377
	P76014
	P76536
	P0ADX7
	P31547
	P28632
	P0AGG0
	P14900
	P40191
	P0A6B4
	P67244
	P16691
	P38521
	P46837
	P02918
	P23827
	P36929
	P69451
	P18196
	P0A6S0
	P36649
	P0AAC8
	P33570
	P77433
	P15877
	P42588
	P32680
	P77735
	Q47147
	P10443
	P0AG93
	P0A6U5
	P10346
	P64612
	P75792
	P25535
	P24205
	Q46864
	P30870
	P0AA97
	P37440
	P0ABE7
	P05458
	P0A9H5
	Q46927
	Q46857
	P0ADP0
	P12295
	P0A6Z6
	P0AFF2
	P0AFZ1
	P37052
	P0AAX8
	P39315
	P0AB96
	P0ADR6
	P77338
	P0AFB8
	P40874
	P60240
	P28629
	P77211
	P39411
	P0AE45
	P69380
	P24251
	P27848
	P76008
	P32131
	P32703
	P69874
	P0A8J4
	Q06065
	P61887
	P52647
	P33018;B1X7P2;B1IYB5;A8A215;Q8X635;Q8FFU3;Q0TFT6;A7ZNX7;Q1R9R8;A1AD14;B1LKQ1
	P27829
	P31455
	P77804
	P60595
	P0ADV7
	P21177
	P34209
	P32176
	P75745
	P76345
	P0A6J5
	P77552
	P25552
	P42641
	P13016
	P0AA53
	P0ABQ4
	P77488
	P0ACB0
	P0A7C2
	P0A847
	P0A6G3
	P32662
	P0AEI4
	P0AGF2
	P21169
	B1IXS3
	P0ABE2
	P0AGG2
	P0A921
	P68739
	P0A8R7
	P0A8V6
	P0A7Y0
	P25516
	P0AFB1
	P0A9F1
	P40710
	P75876
	P38051
	P32160
	P06612
	P37692
	Q47146
	Q57261
	P0AB43
	P0AGI8
	P0ACL0
	P0A7D1
	P0ABQ0
	Q46925
	P0AG24
	P0ADT5
	P77269
	P77475
	P0A6Z1
	P23524
	P77150
	P50457
	P0AA57
	P33218
	P39310
	P0AFI7
	P0AES2
	P0ACL9
	P16095
	P22564
	P0AG40
	P76569
	P37661
	P0A8Z3
	P75867
	P76535
	P77536
	P0A7B3
	P39830
	P18390
	P77791
	P05637
	P77737
	P0A9H3
	P0AEI1
	P0A7Y8
	P27838
	P43337
	P26616
	P0ADX9
	P39384
	P64556;P64555;P64554
	P0A9W0
	P12282
	A8A5M0;B1IP53;B6I2X6;B7L4T9;B7M1W8;A7ZSU1;P13001;C4ZUR7;B1X758;B7UKB7;B7NE17;B1LHL2;Q8X716;B7LSB5;Q8FCT4;Q1R5M2;B7NMH7;B7MDN8;B5YTW3;A1AGT6;Q0TC55
	P0AAE0
	P0ACB4
	P37330
	P0A7H6
	P45425
	P75864
	P0C093
	P0AAH8
	P60752
	P37765
	P31677
	P20083
	P0AAB4
	P0ABQ2
	P39829
	P0A7A2
	P45800
	P77318
	P0AEF0
	P75694
	P0C058
	P07023
	P76423
	P37742
	P33030
	P25748
	P77649
	P75919
	P37685
	P41409
	P77399
	P29208
	P06992
	P0AA39
	P0AEK0
	P76177
	P0A821
	P77252
	P76298
	P77360
	P40719
	P0ACR4
	P76193
	P46890
	P09980
	P0A996
	P0A9J6
	P38506
	P76097
	P21179
	P0AAS0
	P0A742
	P0AEE5
	P00926
	P0AG82
	P76346
	P77357
	P06709
	P0ACN7
	P05707
	P0ADP7
	P27306
	P0AF08
	P64602
	P24228
	P75829
	P0A7E1
	P36999
	P0AAJ5
	P42597
	P37634
	P76594
	P0AFH8
	P08957
	P0AG84
	P21517
	P77748
	P39401
	P21345
	P09155
	P27859
	P17444
	P0AD65
	P0AFI2
	P42596
	P31119
	P22939
	Q47150
	P77674
	P39333
	P0A6W0
	P37028
	P75937
	P32684
	P07117
	P0A959
	P76273
	P52037
	P0ADV1
	P0AAN3
	P08142
	P65870
	P08997
	P23845
	P0ABT5
	P76389
	P77182
	P0AD68
	P16700
	P33371
	P40120
	P31660

## Sheet: Fig 1c
biological_process Gene Ontology Term	-log p-value
enterobactin biosynthetic process	6.92
'de novo' IMP biosynthetic process	5.8
tryptophan biosynthetic process	5.38
cellular amino acid biosynthetic process	3.22
iron ion homeostasis	3.01
mannose transport	2.97
glucose import into cell	2.67
N-acetylglucosamine transport	2.67
fructose import	2.46
glutamine metabolic process	1.67

## Sheet: Fig 1d
biological_process Gene Ontology Term	-log p-value
rRNA base methylation	4.38
peptidoglycan biosynthetic process	3.31
cell division	3.11
tricarboxylic acid cycle	2.24
L-arginine import into cell	2.06
cell wall organization	2.01
aerobic respiration	2
regulation of cell shape	1.88
electron transport coupled proton transport	1.83

## Sheet: Fig 1f
	Iron ion homeostasis
Gene name	fes	cirA	fhuE	feoB	fepA	fhuC	fhuA	fepB
Fold Change (Tumor/LB)	150	150	150	117.453	102.238	25.5617	12.3777	2.71868
	Enterobactin biosynthetic process
Gene name	entC	entH	entB	entE	entA	entF
Fold Change (Tumor/LB)	500	500	486.74	324.97	233.57	94.48

## Sheet: Fig 1g
	LFQ intensity
PBS	0	126420000	71593000	78605000
E. coli	303000000	785390000	844640000	827160000

## Sheet: Fig 2a
		MC38 cancer cell survival rate (%)
		Concentration (μM)	DFO			Concentration (μM)	Ciclopirox			Concentration (μM)	VLX600
		0	100	100	100	0	100	100	100	0	100	100	100
		0.01	105.247	96.3702	111.646	0.01	109.311	100	110.961	0.01	98.2496	90.8893	100.885
		0.1	100.886	85.0998	97.2598	0.1	94.7908	98.4315	65.9138	0.1	94.8169	66.8774	121.134
		1	124.656	79.0835	123.086	1	27.4013	24.2902	24.0885	0.25	80.9839	57.4868	90.1551
		5	105.032	83.6559	103.46	5	8.82734	6.6444	6.12811	0.5	18.3108	12.0108	12.4129
		10	78.076	74.832	84.9289	10	8.59163	4.9016	5.14145	1	8.11454	6.10433	3.55454
		25	27.3272	17.2767	48.9296	25	8.49735	6.60083	7.20728	5	7.63871	4.90759	3.50369
		50	12.4716	9.25499	16.4926	50	8.75663	6.70249	5.69645	10	8.2165	4.1355	3.59522
		100	6.86474	4.10107	9.16253	100	8.02593	5.23564	5.63478	25	10.5617	6.52898	3.34096
		E. coli (BL21) survival rate (%)
		Concentration (μM)	Deferoxamine			Concentration (μM)	Ciclopirox			Concentration (μM)	VLX600
		0	100	100	100	0	100	100	100	0	100	100	100
		0.01	100.74	103.62	99.604	0.01	96.765	93.015	105.45	0.01	99.338	100	110.81
		0.1	96.073	105.37	104.75	0.1	103.44	92.402	105.05	0.1	98.529	99.359	106.53
		1	99.729	99.871	97.627	1	92.318	99.755	100.67	0.25	100.07	103.56	105.34
		10	94.177	100.26	94.331	5	87.668	88.603	95.76	0.5	95.074	95.085	103.23
		25	100.54	94.893	92.156	10	54.784	74.142	84.32	1	95.662	95.37	100.7
		50	90.454	100.45	94.858	25	33.154	44.485	28.802	2.5	93.529	96.083	99.93
		100	93.094	96.186	89.255	50	14.892	27.819	11.911	5	88.897	88.39	92.486
						100	15.768	20.711	7.0659	10	82.574	99.217	81.742

## Sheet: Fig 2c
	WT			CDG			No treatment
Concentration (pg/ml)	438.2	466.9	503.7	511.9	575.9	544.8	0	0	0

## Sheet: Fig 2e
	Tumor volume (mm^3)
Days after 1st treatment	PBS							WT						VLX600				WT + VLX600			CDG					CDG + VLX600
0	164.9	261.3	103.3	261.3	166	140.2	145.1	164.2	144.1	136	156.4	156.7	157.8	228.3	128.8	158.2	166	273.3	110.9	191.7	173.4	197.8	112.9	248.2	152.9	129.1	118.9	107.6	91.8
3	161.1	494.7	281.5	783.7	482	267.2	296.3	160.3	196.5	241.1	187.3	204.4	314.3	253.5	199.8	220.7	298.9	282.5	262.8	221.6	140.5	167.1	72.7	195.7	118.6	112.3	197.3	75.7	165.3
6	692.1	1074	673.4	1231.7	989	822.2	1045.2	288.8	260.3	289.3	163.5	327.3	436.7	510.7	594.3	694	629	569.9	110.6	242.5	124.2	177.6	209.4	409.6	215	170.1	216.8	102	254.4
9	1273.7	2190.4	1546.3	1884.4	2370	1187.8	1256.8	360.4	717.9	281.5	243.9	402.9	711.2	1129.3	921.2	1585.3	1365.1	1351.8	101.5	325	411.6	811.7	202.3	876.3	221.1	182.2	379.1	77.2	293.6
12	2467.9	3058	2616.1	3651.8	3050.4	2323.2	2254.1	482	1043.9	369.7	350.2	468	1179.7	2577.4	2600.1	3236.7	2798.8	2090.2	75.2	898.6	431.9	1473.2	266.2	967.7	108.4	266.2	136.3	13.4	28.5

## Sheet: Fig 2f
	Tumor size > 1500 mm^3
Days after 1st treatment	PBS	WT	VLX600	WT + VLX600	CDG	CDG + VLX600
9	4	0	1	0	0	0
12	7	0	4	1	0	0
15	7	1	4	2	2	0
18	7	3	4	2	4	0

## Sheet: Fig 3a
	CFU / ml
Lcn2 concentration (nM)	WT		IroA		△entE
0	20000000	15000000	2500000	1900000	0	0
0.1	6000000	9000000	2700000	2900000	0	0
0.5	5000000	6000000	2600000	2400000	0	0
1	4000000	2000000	2700000	2200000	0	0
10	500	60	1500000	1400000	0	0
50	13	17	160000	170000	0	0

[truncated: 19 more sheets: Fig 3b, Fig 3c, Fig 3e, Fig 3f, Fig 3g, Fig 3h, Fig 3i, Fig 3j, Fig 3k, Fig 4b, Fig 4c, Fig 4d, Fig 5a, Fig 5b, Fig 5c, Fig 5d, Fig 6b, Fig 6c, Fig 6d,e]
